# Supplementary material for: Ceiling of Barium Substitution for B‐Site Cation in Organometal Halide Perovskite Solar Cells
Source: Hindawi journal article supplement (doi:10.1155/2024/9990559), 2024-01-01
Supplement: f1 [file 9990559.f1.docx]

**Ceiling of Barium Substitution for B-site Cation in Organometal Halide Perovskite Solar Cells**

Kai-Chi Hsiao†a, Chi-Mei Ho†a, Ting-Han Lina, Shih-Hsuan Chena, Yin-Hsuan Changa**,** Ying-Han Liaoa, Jia-Mao Chang a, Tz-Feng Lin*d, Yu-Ching Huang*e, Kun-Mu Lee*a,b,c, and Ming-Chung Wu*a,b,c,e

1. Department of Chemical and Materials Engineering, Chang Gung University, Taoyuan 33302, Taiwan.
2. Center for Sustainability and Energy Technologies, Chang Gung University, Taoyuan 33302, Taiwan.
3. Division of Neonatology, Department of Pediatrics, Chang Gung Memorial Hospital, Linkou, Taoyuan 33305, Taiwan.
4. Department of Fiber and Composite Materials, Feng Chia University, Taichung 40724, Taiwan.
5. Department of Materials Engineering, Ming Chi University of Technology, New Taipei City, 24301, Taiwan.

† These authors contributed equally to this work

*Corresponding authors.

Ming-Chung Wu: e-mail, mingchungwu@cgu.edu.tw; phone, +886 3 2118800 #3834; fax, +886 3 2118800 #5324

Kun-Mu Lee: e-mail, kmlee@cgu.edu.tw; phone, +886 3 2118800 #3891; fax, +886 3 2118800 #5771

Yu-Chin Huang: e-mail, huangyc@mail.mcut.edu.tw; phone, +886 2 29089899 #4477; fax, +886 2 2908-4091

Tz-Feng Lin: e-mail, tflin@fcu.edu.tw; phone, +886 4 24517250 #3453


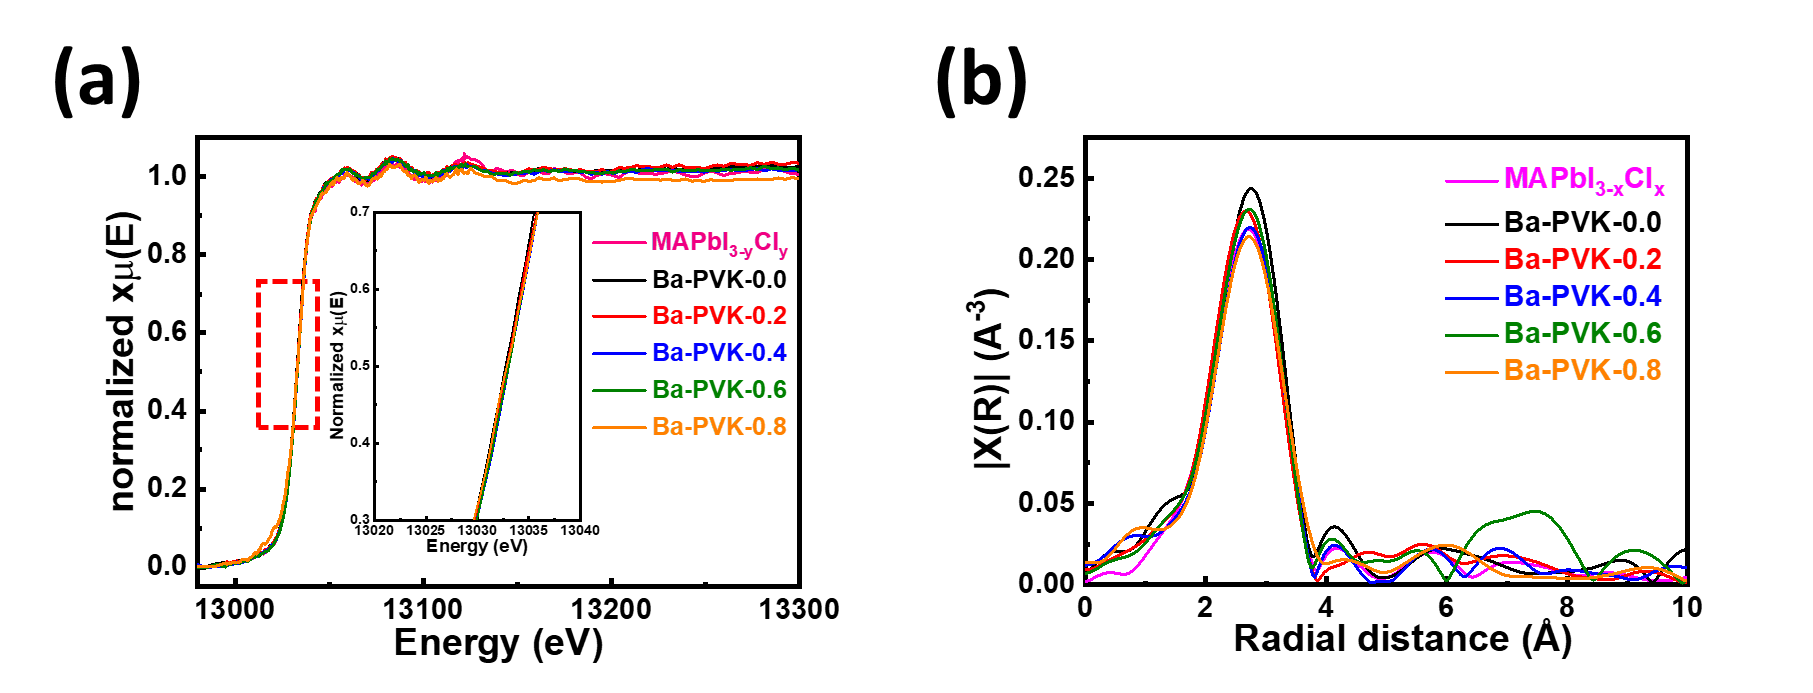


**Figure S1**. X-ray absorption spectra of FAxMA1-xPb0.85Ba0.15I3-yCly films, x from 0.0 to 0.8: (a) X-ray absorption of Pb K-edge and (b) converted real space of Pb X-ray absorption fine structure.


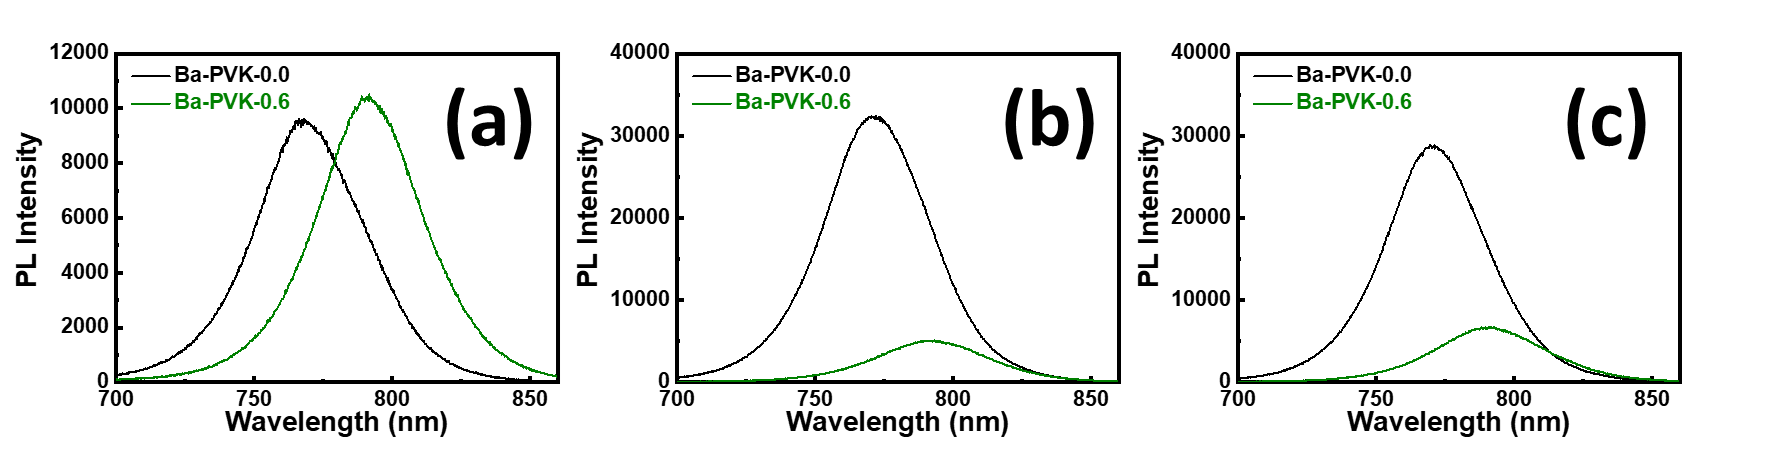


**Figure S2**. Photoluminescence spectrum of Ba-PVK-0.0 and Ba-PVK-0.6 covered with a quench layer or an insulated layer: **(a)** covered with PMMA (insulated layer), **(b)** covered with PC61BM (electron transport layer), and **(c)** covered with Spiro-MeOTAD (hole transport layer).


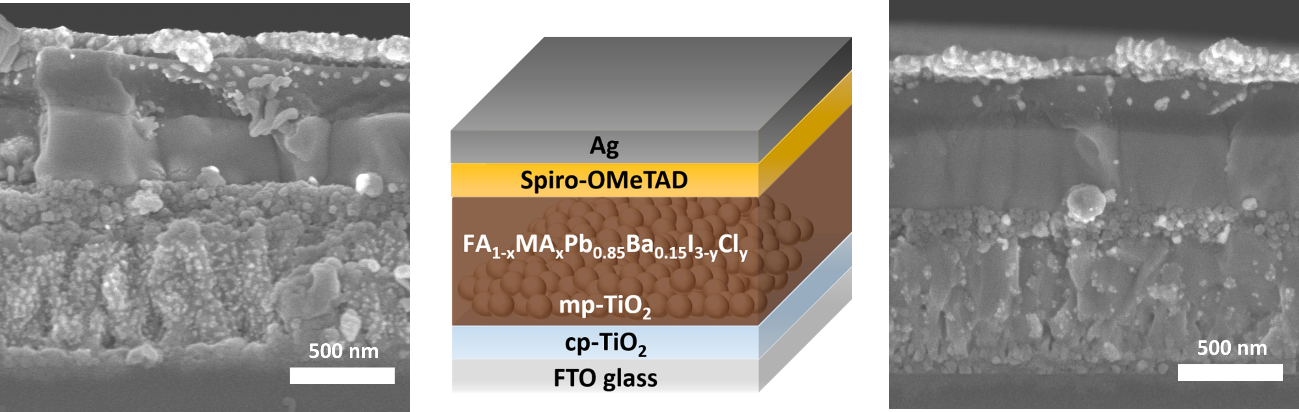


**Figure S3**. Device structure and cross-sectional FE-SEM for MAPb0.85Ba0.15I3-yCly (**left**) and FA0.6MA0.4Pb0.85Ba0.15I3-yCly (**right**) perovskite.


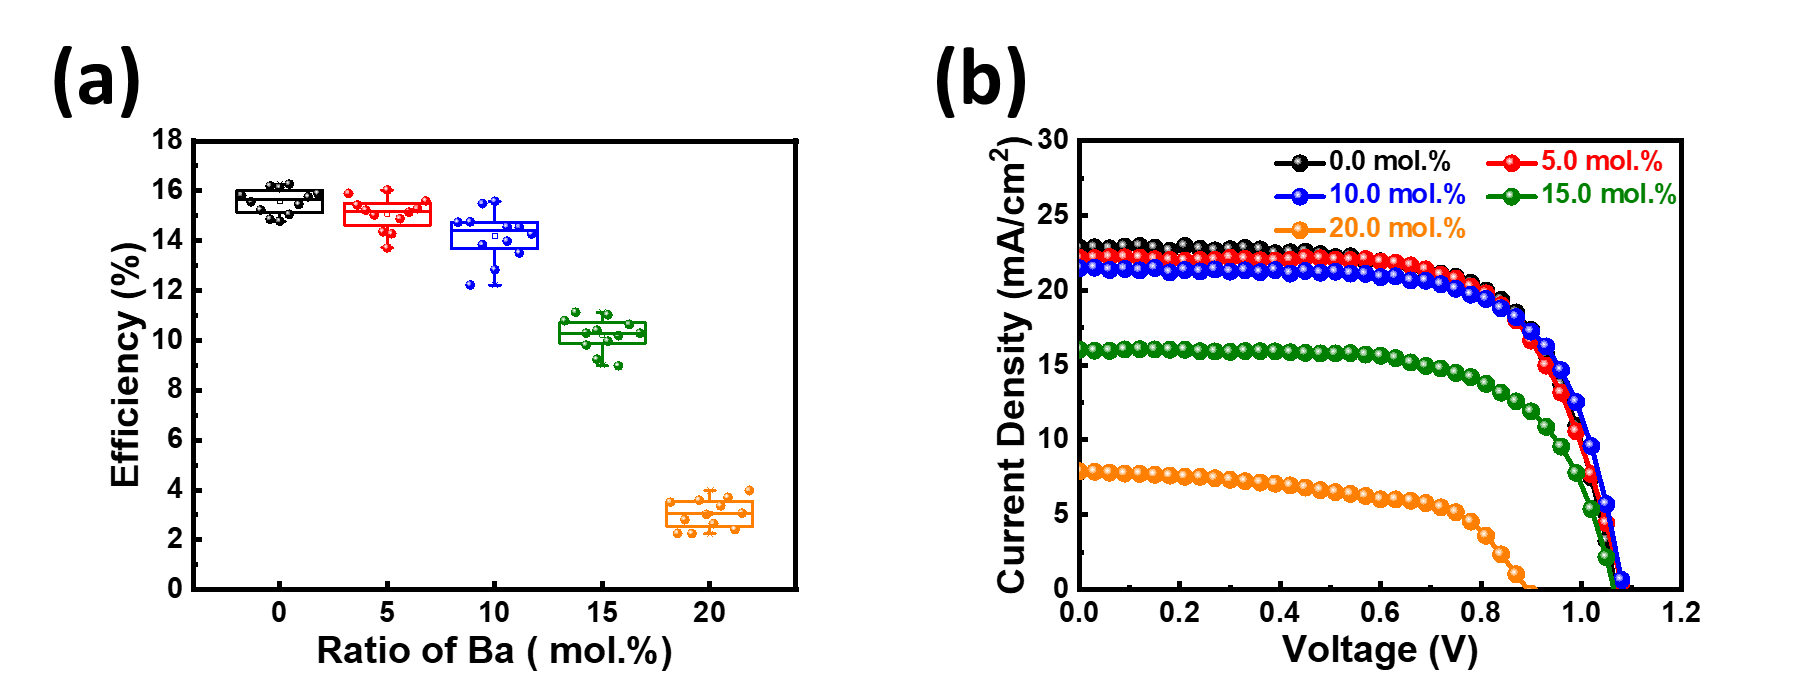


**Figure S4**. Photovoltaic performance for devices with various ratios of barium substitution: **(a)** PCE distribution and **(b)** *J-V* curves of champion devices. (Ba substitution ratio from 0 mol.% to 20 mol.%)

**Table S1**. Calculated film coverage and surface roughness of perovskite with various ratios of formamidinium, FAxMA1-xPb0.85Ba0.15I3-yCly

| **X ratio** | **Calculated film coverage (%)** | **Calculated surface roughness, Rms (nm)** |
| --- | --- | --- |
| 0.0 | 94.9 | 55.2 |
| 0.2 | 95.6 | 80.3 |
| 0.4 | 95.8 | 83.6 |
| 0.6 | 96.7 | 47.5 |
| 0.8 | 99.8 | 67.5 |
